# Supplementary material for: Humidity and Deposition Solution Play a Critical Role in Virus Inactivation by Heat Treatment of N95 Respirators
Source: PubMed Central journal article supplement (PMC7580954; doi:10.1128/msphere.00588-20), 2020-10-21
Supplement: mSphere.00588-20-st001.pdf [file mSphere.00588-20-st001.pdf]

| Virus | Relative humidity (%) | 72°C <sup>a</sup>         |                           |                     |                     | 82°C <sup>a</sup>         |                           |                     |                     |     |  |      |  |        |  |
|-------|-----------------------|---------------------------|---------------------------|---------------------|---------------------|---------------------------|---------------------------|---------------------|---------------------|-----|--|------|--|--------|--|
|       |                       | PBS                       |                           | DMEM <sup>b</sup>   |                     | Saliva                    |                           | PBS + BSA           |                     | PBS |  | DMEM |  | Saliva |  |
| MS2   | 1                     | 0.11 0.36<br>(0.24)       | 1.31 1.57<br>(1.44)       | -                   | -                   | 0.08 0.29<br>(0.19)       | 2.42 3.12<br>(2.77)       | 0.73 1.02<br>(0.88) | 0.90 0.64<br>(0.77) |     |  |      |  |        |  |
|       | 13                    | 0.41 0.34<br>(0.38)       | 5.02 4.75<br>(4.89)       | 1.01 0.96<br>(0.99) | 1.53 1.46<br>(1.5)  | 1.36 0.96<br>(1.16)       | 5.54 > 6.35<br>(5.93)     | 1.44 2.03<br>(1.74) | 3.28 3.64<br>(3.46) |     |  |      |  |        |  |
|       | 25                    | 1.31 1.46<br>(1.39)       | 6.41 6.28<br>(6.35)       | 1.41 1.48<br>(1.45) | 2.25 3.18<br>(2.72) | 4.07 4.03<br>(4.05)       | > 6.86 > 6.18<br>(> 6.52) | -                   | -                   |     |  |      |  |        |  |
|       | 36                    | 3.71 3.72<br>(3.72)       | > 6.67 > 6.74<br>(> 6.71) | -                   | -                   | > 6.71 6.03<br>(> 6.37)   | > 6.80 > 6.75<br>(> 6.78) | -                   | -                   |     |  |      |  |        |  |
|       | 48                    | > 6.81 6.64<br>(> 6.73)   | > 6.57 > 6.19<br>(> 6.38) | -                   | -                   | > 6.78 > 6.32<br>(> 6.55) | > 6.58 > 5.48<br>(> 6.03) | -                   | -                   |     |  |      |  |        |  |
|       | 71                    | > 6.85 > 6.62<br>(> 6.74) | > 6.86 > 6.43<br>(> 6.65) | -                   | -                   | > 6.58 > 7.09<br>(> 6.84) | > 6.83 > 7.13<br>(> 6.98) | -                   | -                   |     |  |      |  |        |  |
|       | 89                    | > 7.11 > 6.62<br>(> 6.87) | > 6.93 > 6.19<br>(> 6.56) | -                   | -                   | > 6.83 > 6.96<br>(> 6.90) | > 6.99 > 7.33<br>(> 7.16) | -                   | -                   |     |  |      |  |        |  |
| phi6  | 1                     | 0.85 1.12<br>(0.99)       | 2.77 2.38<br>(2.58)       | -                   | -                   | 0.79 2.16<br>(1.48)       | 3.08 4.66<br>(3.87)       | 1.11 1.06<br>(1.09) | 1.07 0.44<br>(0.76) |     |  |      |  |        |  |
|       | 13                    | 1.97 1.27<br>(1.62)       | 4.48 4.12<br>(4.3)        | 1.19 0.70<br>(0.95) | 1.26 1.40<br>(1.33) | 3.84 2.97<br>(3.41)       | 6.61 7.18<br>(6.9)        | 2.33 2.91<br>(2.62) | 2.44 1.51<br>(1.98) |     |  |      |  |        |  |
|       | 25                    | 3.07 2.63<br>(2.85)       | 6.02 > 7.44<br>(> 6.73)   | 1.78 1.60<br>(1.69) | 1.11 1.56<br>(1.34) | 5.60 5.38<br>(5.49)       | > 8.08 > 7.18<br>(> 7.63) | -                   | -                   |     |  |      |  |        |  |
|       | 36                    | 4.88 5.65<br>(5.27)       | > 7.70 > 7.41<br>(> 7.56) | -                   | -                   | > 7.25 > 6.30<br>(> 6.78) | > 7.40 > 6.38<br>(> 6.89) | -                   | -                   |     |  |      |  |        |  |
|       | 48                    | 7.14 7.03<br>(7.09)       | > 7.76 > 7.45<br>(> 7.61) | -                   | -                   | > 6.97 > 6.49<br>(> 6.73) | > 7.55 > 5.95<br>(> 6.75) | -                   | -                   |     |  |      |  |        |  |
|       | 71                    | > 6.20 > 7.05<br>(> 6.63) | > 7.83 > 7.10<br>(> 7.47) | -                   | -                   | > 7.08 > 7.02<br>(> 7.05) | > 7.40 > 7.54<br>(> 7.47) | -                   | -                   |     |  |      |  |        |  |
|       | 89                    | > 6.86 > 6.72<br>(> 6.79) | > 7.62 > 6.00<br>(> 6.81) | -                   | -                   | > 7.07 > 6.33<br>(> 6.70) | > 7.74 > 7.51<br>(> 7.63) | -                   | -                   |     |  |      |  |        |  |
| IAV   | 1                     | -                         | 2.56 2.45<br>(2.51)       | -                   | -                   | -                         | 3.85 2.75<br>(3.30)       | -                   | -                   |     |  |      |  |        |  |
|       | 13                    | -                         | 3.98 3.50<br>(3.74)       | -                   | -                   | -                         | > 3.96 4.14<br>(> 4.05)   | -                   | -                   |     |  |      |  |        |  |
|       | 25                    | -                         | 3.61 > 4.05<br>(> 3.83)   | -                   | -                   | -                         | > 3.89 > 4.49<br>(> 4.19) | -                   | -                   |     |  |      |  |        |  |
|       | 89                    | -                         | > 4.19 > 4.19<br>(> 4.19) | -                   | -                   | -                         | > 4.33 > 4.43<br>(> 4.38) | -                   | -                   |     |  |      |  |        |  |
| MHV   | 1                     | -                         | 0.89 1.60<br>(1.25)       | -                   | -                   | -                         | 2.89 2.53<br>(2.71)       | -                   | -                   |     |  |      |  |        |  |
|       | 13                    | -                         | 2.56 2.48<br>(2.52)       | -                   | -                   | -                         | > 4.17 > 3.45<br>(> 3.81) | -                   | -                   |     |  |      |  |        |  |
|       | 25                    | -                         | > 3.52 > 3.59<br>(> 3.56) | -                   | -                   | -                         | > 3.56 > 3.31<br>(> 3.44) | -                   | -                   |     |  |      |  |        |  |
|       | 89                    | -                         | > 3.83 > 3.59<br>(> 3.71) | -                   | -                   | -                         | > 3.30 > 3.43<br>(> 3.37) | -                   | -                   |     |  |      |  |        |  |

<sup>a</sup>Replicates shown side-by-side for a given treatment, and arithmetic mean shown in parentheses below replicates. Greater than symbol is used to designate replicates outside of dynamic range. For treatment settings with one or more replicates outside of dynamic range, the arithmetic mean was calculated from the values shown.

<sup>b</sup>DMEM-A was used as the deposition solution for MS2, phi6, and IAV experiments, and DMEM-B was used as the deposition solution for MHV experiments.
