# Supplementary material for: Humidity and Deposition Solution Play a Critical Role in Virus Inactivation by Heat Treatment of N95 Respirators
Source: PubMed Central journal article supplement (PMC7580954; doi:10.1128/msphere.00588-20), 2020-10-21
Supplement: mSphere.00588-20-st002.pdf [file mSphere.00588-20-st002.pdf]

| Virus     | Treatment              |                | 72°C versus<br>82°C      |
|-----------|------------------------|----------------|--------------------------|
|           | Deposition<br>Solution | RH (%)         |                          |
| MS2       | PBS                    | 1              | 0.306<br>(0.79)          |
|           |                        | 13             | 3.87<br>(0.061)          |
|           |                        | 25             | 34.3<br><b>(0.0008)</b>  |
|           | DMEM-A                 | 1              | 3.56<br>(0.071)          |
|           | Saliva                 | 13             | 2.53<br>(0.13)           |
|           | PBS + BSA              | 13             | 10.7<br><b>(0.0086)</b>  |
| phi6      | PBS                    | 1              | 0.702<br>(0.56)          |
|           |                        | 13             | 3.20<br>(0.086)          |
|           |                        | 25             | 10.73<br><b>(0.0086)</b> |
|           | DMEM-A                 | 1              | 1.59<br>(0.25)           |
|           |                        | 13             | 7.79<br><b>(0.017)</b>   |
|           | Saliva                 | 13             | 4.41<br><b>(0.048)</b>   |
| PBS + BSA | 13                     | 1.37<br>(0.30) |                          |
| IAV       | DMEM-A                 | 1              | 1.44<br>(0.29)           |
| MHV       | DMEM-B                 | 1              | 3.68<br>(0.067)          |

<sup>a</sup>Significant p-values are indicated in bold (significance considered  $p < 0.05$ ).
