# Supplementary material for: Humidity and Deposition Solution Play a Critical Role in Virus Inactivation by Heat Treatment of N95 Respirators
Source: PubMed Central journal article supplement (PMC7580954; doi:10.1128/msphere.00588-20), 2020-10-21
Supplement: mSphere.00588-20-st003.pdf [file mSphere.00588-20-st003.pdf]

| Temperature<br>(°C) | Virus | Matrix | t-test (p-value) <sup>a</sup> |                         |                         |                        |    |
|---------------------|-------|--------|-------------------------------|-------------------------|-------------------------|------------------------|----|
|                     |       |        | 1% versus<br>13% RH           | 13% versus<br>25% RH    | 25% versus<br>36% RH    | 36% versus<br>48% RH   |    |
| 72                  | MS2   | PBS    | 1.08<br>(0.39)                | 12.2<br><b>(0.0066)</b> | 31.0<br><b>(0.001)</b>  | NA                     |    |
|                     |       | DMEM-A | 18.38<br><b>(0.0029)</b>      | 9.74<br><b>(0.010)</b>  | NA                      | NA                     |    |
|                     | phi6  | PBS    | 1.69<br>(0.23)                | 2.98<br>(0.10)          | 5.45<br><b>(0.032)</b>  | 4.68<br><b>(0.043)</b> |    |
|                     |       | DMEM-A | 6.50<br><b>(0.023)</b>        | NA                      | NA                      | NA                     |    |
|                     | IAV   | DMEM-A | 5.02<br><b>(0.038)</b>        | NA                      | -                       | -                      |    |
|                     | MHV   | DMEM-B | 3.57<br>(0.070)               | NA                      | -                       | -                      |    |
|                     | 82    | MS2    | PBS                           | 4.32<br>(0.050)         | 14.4<br><b>(0.0048)</b> | NA                     | NA |
|                     |       |        | DMEM-A                        | 5.93<br><b>(0.027)</b>  | NA                      | NA                     | NA |
| phi6                |       | PBS    | 2.38<br>(0.14)                | 4.65<br><b>(0.043)</b>  | NA                      | NA                     |    |
|                     |       | DMEM-A | 3.60<br>(0.069)               | NA                      | NA                      | NA                     |    |

<sup>a</sup>Significant p-values are indicated in bold (significance considered  $p < 0.05$ ).

NA = Not assessed, because values were below detection limits.
