# Supplementary material for: Humidity and Deposition Solution Play a Critical Role in Virus Inactivation by Heat Treatment of N95 Respirators
Source: PubMed Central journal article supplement (PMC7580954; doi:10.1128/msphere.00588-20), 2020-10-21
Supplement: mSphere.00588-20-st004.pdf [file mSphere.00588-20-st004.pdf]

| Treatment           |                  |                        | t-test (p-value) <sup>a</sup> |                        |                         |                 |                        |                        |   |
|---------------------|------------------|------------------------|-------------------------------|------------------------|-------------------------|-----------------|------------------------|------------------------|---|
| Deposition solution | Temperature (°C) | RH (%)                 | MS2 versus phi6               | MS2 versus IAV         | MS2 versus MHV          | phi6 versus IAV | phi6 versus MHV        | IAV versus MHV         |   |
| DMEM                | 72               | 1                      | 4.84<br><b>(0.040)</b>        | 7.55<br><b>(0.017)</b> | 0.52<br>(0.66)          | 0.346<br>(0.76) | 3.28<br>(0.082)        | 3.51<br>(0.073)        |   |
|                     |                  | 13                     | 2.60<br>(0.12)                | 4.16<br>(0.053)        | 16.8<br><b>(0.0035)</b> | 1.87<br>(0.20)  | 9.65<br><b>(0.011)</b> | 5.01<br><b>(0.038)</b> |   |
|                     | 82               | 1                      | 1.27<br>(0.33)                | 0.813<br>(0.50)        | 0.152<br>(0.89)         | 0.592<br>(0.61) | 1.43<br>(0.29)         | 1.02<br>(0.42)         |   |
|                     |                  | 72                     | 1                             | 4.08<br>(0.055)        | -                       | -               | -                      | -                      | - |
|                     |                  |                        | 13                            | 3.54<br>(0.071)        | -                       | -               | -                      | -                      | - |
|                     |                  |                        | 25                            | 6.30<br><b>(0.024)</b> | -                       | -               | -                      | -                      | - |
| 82                  | 36               | 4.03<br>(0.057)        | -                             | -                      | -                       | -               | -                      |                        |   |
|                     | 1                | 4.68<br><b>(0.043)</b> | -                             | -                      | -                       | -               | -                      |                        |   |
|                     | 13               | 1.14<br>(0.37)         | -                             | -                      | -                       | -               | -                      |                        |   |
| PBS                 | 72               | 25                     | 5.43<br><b>(0.032)</b>        | -                      | -                       | -               | -                      | -                      |   |
|                     |                  | 82                     | 1                             | 1.43<br>(0.29)         | -                       | -               | -                      | -                      |   |
|                     |                  |                        | 13                            | 2.14<br>(0.17)         | -                       | -               | -                      | -                      |   |
|                     | 72               | 13                     | 0.162<br>(0.89)               | -                      | -                       | -               | -                      | -                      |   |
| 25                  |                  | 2.54<br>(0.13)         | -                             | -                      | -                       | -               | -                      |                        |   |
| Saliva              | 82               | 1                      | 1.43<br>(0.29)                | -                      | -                       | -               | -                      | -                      |   |
|                     |                  | 13                     | 2.14<br>(0.17)                | -                      | -                       | -               | -                      | -                      |   |
| PBS + BSA           | 72               | 13                     | 2.1<br>(0.17)                 | -                      | -                       | -               | -                      | -                      |   |
|                     |                  | 25                     | 2.7<br>(0.12)                 | -                      | -                       | -               | -                      | -                      |   |
|                     | 82               | 1                      | 0.0440<br>(0.97)              | -                      | -                       | -               | -                      | -                      |   |
|                     |                  | 13                     | 2.98<br>(0.10)                | -                      | -                       | -               | -                      | -                      |   |

<sup>a</sup>Significant p-values are indicated in bold (significance considered  $p < 0.05$ ).
