# Supplementary material for: Humidity and Deposition Solution Play a Critical Role in Virus Inactivation by Heat Treatment of N95 Respirators
Source: PubMed Central journal article supplement (PMC7580954; doi:10.1128/msphere.00588-20), 2020-10-21
Supplement: mSphere.00588-20-st005.pdf [file mSphere.00588-20-st005.pdf]

| <b>Component</b>                                                                | <b>Type</b>      | <b>DMEM-A</b> | <b>DMEM-B</b> |
|---------------------------------------------------------------------------------|------------------|---------------|---------------|
| <i>DMEM</i>                                                                     |                  |               |               |
| Glycine                                                                         | Amino Acid       | 0.4 mM        | 0.4 mM        |
| L-Arginine hydrochloride                                                        | Amino Acid       | 0.4 mM        | 0.4 mM        |
| L-Cystine 2HCl                                                                  | Amino Acid       | 0.2 mM        | 0.2 mM        |
| L-Glutamine                                                                     | Amino Acid       | 4 mM          | 2 mM*         |
| L-Histidine hydrochloride-H <sub>2</sub> O                                      | Amino Acid       | 0.2 mM        | 0.2 mM        |
| L-Isoleucine                                                                    | Amino Acid       | 0.8 mM        | 0.8 mM        |
| L-Leucine                                                                       | Amino Acid       | 0.8 mM        | 0.8 mM        |
| L-Lysine hydrochloride                                                          | Amino Acid       | 0.8 mM        | 0.8 mM        |
| L-Methionine                                                                    | Amino Acid       | 0.2 mM        | 0.2 mM        |
| L-Phenylalanine                                                                 | Amino Acid       | 0.4 mM        | 0.4 mM        |
| L-Serine                                                                        | Amino Acid       | 0.4 mM        | 0.4 mM        |
| L-Threonine                                                                     | Amino Acid       | 0.8 mM        | 0.8 mM        |
| L-Tryptophan                                                                    | Amino Acid       | 0.08 mM       | 0.08 mM       |
| L-Tyrosine disodium salt dihydrate                                              | Amino Acid       | 0.4 mM        | 0.4 mM        |
| L-Valine                                                                        | Amino Acid       | 0.8 mM        | 0.8 mM        |
| Choline chloride                                                                | Vitamin          | 0.03 mM       | 0.03 mM       |
| D-Calcium pantothenate                                                          | Vitamin          | 0.01 mM       | 0.008 mM      |
| Folic acid                                                                      | Vitamin          | 0.01 mM       | 0.009 mM      |
| i-Inositol                                                                      | Vitamin          | 0.04 mM       | 0.04 mM       |
| Niacinamide                                                                     | Vitamin          | 0.03 mM       | 0.03 mM       |
| Pyridoxine hydrochloride                                                        | Vitamin          | 0.02 mM       | 0.02 mM       |
| Riboflavin                                                                      | Vitamin          | 0.001 mM      | 0.001 mM      |
| Thiamine hydrochloride                                                          | Vitamin          | 0.01 mM       | 0.01 mM       |
| Calcium Chloride (CaCl <sub>2</sub> ) (anhyd.)                                  | Inorganic Salt   | 1.8 mM        | 1.8 mM        |
| Ferric Nitrate (Fe(NO <sub>3</sub> ) <sub>3</sub> ·9H <sub>2</sub> O)           | Inorganic Salt   | 0.0002 mM     | 0.0002 mM     |
| Magnesium Sulfate (MgSO <sub>4</sub> ) (anhyd.)                                 | Inorganic Salt   | 0.8 mM        | 0.8 mM        |
| Potassium Chloride (KCl)                                                        | Inorganic Salt   | 5.3 mM        | 5.4 mM        |
| Sodium Bicarbonate (NaHCO <sub>3</sub> )                                        | Inorganic Salt   | 44 mM         | 44 mM         |
| Sodium Chloride (NaCl)                                                          | Inorganic Salt   | 110.3 mM      | 109.5 mM      |
| Sodium Phosphate monobasic (NaH <sub>2</sub> PO <sub>4</sub> ·H <sub>2</sub> O) | Inorganic Salt   | 0.9 mM        | 0.9 mM        |
| D-Glucose (Dextrose)                                                            | Other            | 25 mM         | 25 mM         |
| Phenol red                                                                      | Other            | 0.04 mM       | 0.04 mM       |
| <i>HEPES (N-2-hydroxyethylpiperazine-N-2-ethane sulfonic acid)</i>              | Organic Chemical | 25 mM         | -             |
| <i>Bovine serum albumin (Fraction V)</i>                                        | Protein          | 0.19%         | -             |
| <i>Horse serum</i>                                                              | Protein          | -             | 2%            |
| <i>Penicillin/Streptomycin</i>                                                  | Antibiotics      | 1%            | 1%            |

\*Not in DMEM, added separately.
