# Supplementary material for: Humidity and Deposition Solution Play a Critical Role in Virus Inactivation by Heat Treatment of N95 Respirators
Source: PubMed Central journal article supplement (PMC7580954; doi:10.1128/msphere.00588-20), 2020-10-21
Supplement: mSphere.00588-20-st006.pdf [file mSphere.00588-20-st006.pdf]

| Temperature (°C) | Virus | RH (%) | t-test (p-value) <sup>a</sup> |                         |                         |                          |                         |
|------------------|-------|--------|-------------------------------|-------------------------|-------------------------|--------------------------|-------------------------|
|                  |       |        | PBS versus saliva             | PBS versus PBS+BSA      | PBS versus DMEM-A       | DMEM-A versus saliva     | DMEM-A versus PBS+BSA   |
| 72               | MS2   | 1      | -                             | -                       | 6.68<br><b>(0.022)</b>  | -                        | -                       |
|                  |       | 13     | 14.2<br><b>(0.0049)</b>       | 22.6<br><b>(0.0019)</b> | 32.3<br><b>(0.0010)</b> | 28.4<br><b>(0.0012)</b>  | 24.3<br><b>(0.0017)</b> |
|                  |       | 25     | 0.725<br>(0.54)               | 2.82<br>(0.11)          | 50.0<br><b>(0.0004)</b> | 66.40<br><b>(0.0002)</b> | 7.73<br><b>(0.016)</b>  |
|                  | phi6  | 1      | -                             | -                       | 6.70<br><b>(0.022)</b>  | -                        | -                       |
|                  |       | 13     | 1.58<br>(0.25)                | 0.81<br>(0.50)          | 6.81<br><b>(0.021)</b>  | 11.0<br><b>(0.0081)</b>  | 15.4<br><b>(0.0042)</b> |
|                  |       | 25     | 4.88<br><b>(0.040)</b>        | 4.81<br><b>(0.041)</b>  | NA                      | NA                       | NA                      |
| 82               | MS2   | 1      | 3.85<br>(0.061)               | 3.50<br>(0.073)         | 7.07<br><b>(0.019)</b>  | 5.00<br><b>(0.038)</b>   | 5.36<br><b>(0.033)</b>  |
|                  |       | 13     | 1.61<br>(0.25)                | 8.55<br><b>(0.013)</b>  | NA                      | NA                       | NA                      |
|                  | phi6  | 1      | 0.569<br>(0.63)               | 0.955<br>(0.44)         | 2.29<br>(0.15)          | 3.52<br>(0.072)          | 3.66<br>(0.067)         |
|                  |       | 13     | 1.50<br>(0.27)                | 2.25<br>(0.15)          | 6.71<br><b>(0.021)</b>  | 10.5<br><b>(0.0089)</b>  | 9.02<br><b>(0.012)</b>  |

<sup>a</sup>Significant p-values are indicated in bold (significance considered  $p < 0.05$ ).

NA = Not assessed, because values were below detection limits.
