# Supplementary material for: Humidity and Deposition Solution Play a Critical Role in Virus Inactivation by Heat Treatment of N95 Respirators
Source: PubMed Central journal article supplement (PMC7580954; doi:10.1128/msphere.00588-20), 2020-10-21
Supplement: mSphere.00588-20-st007.pdf [file mSphere.00588-20-st007.pdf]

| <b>Matrix</b> | <b>Description</b>                                                                        |
|---------------|-------------------------------------------------------------------------------------------|
| DMEM-A        | DMEM supplemented with 0.1875% Fraction V BSA, 25 mM HEPES, and 1% antibiotics (Table S2) |
| DMEM-B        | DMEM supplemented with 2% horse serum, L-glutamine, and 1% antibiotics (Table S2)         |
| PBS           | 1X phosphate buffered saline (Invitrogen)                                                 |
| PBS + BSA     | 1X phosphate buffered saline (Invitrogen) supplemented with 0.1875% Fraction V BSA        |
| Saliva        | UV <sub>254</sub> sterilized fresh saliva collected from human volunteers                 |
